# Supplementary material for: Parents’ working conditions and adolescent depression in China: A causal mediation analysis using the parametric G-Formula
Source: Research Square preprint supplement (doi:10.21203/rs.3.rs-8781680/v1), 2026-02-12
Supplement: Supplementary file 1 [file 3ab3adfc39379731d8bc7f7a.docx]

Supplementary Tables & Figures

**Table S1 Scenarios for simulated interventions**

| **Intervention scenario** | **Single-factor intervention description** |
| --- | --- |
| **(1) Altering job type** | Set job type to be farming, self-employed, or employed. |
| 1. **Altering working hours** | 1. Low-hour intervention: Set working hours to a fixed value of 28   hours/week.  2. Medium-hour intervention: Set working hours to a fixed value of 42 hours/week.  3. High-hour intervention: Set working hours to a fixed value of 84  hours/week. |
| 1. **Altering work environment** | Set the work environment to be outdoors, workshop/factory, office,  home, other indoors, inside a vehicle, or other. |
| 1. **Altering job**   **promotion status** | Set promotion status to: administrative promotion only, technical title  promotion only, both administrative and technical promotion, no  promotion, or a job with no higher position available. |
| 1. **Altering work stress** | 1. Low-stress intervention: Set the work stress index to a fixed value of 2.   2. Medium-stress intervention: Set the work stress index to a fixed  value of 8.  3. High-stress intervention: Set the work stress index to a fixed value of 15. |
| 1. **Altering work income** | 1. Low-income intervention: Set annual work income to a fixed value   of ¥18,000 (25th percentile).  2. Medium-income intervention: Set annual work income to a fixed  value of ¥30,000 (50th percentile).  3. High-income intervention: Set annual work income to a fixed value  of ¥50,000 (75th percentile). |

**Table S2 Results of sensitivity analysis**

| **Intervention**  **Variable** | **Intervention**  **Measure** | **G-formula Mean (95% CI)** | **RR (95% CI)** |
| --- | --- | --- | --- |
| **Types of**  **Work** | Natural process | **2.459 (0.955,4.664)** | **1.000 (1.000,1.000)** |
| Farming | **3.660 (0.645,6.715)** | **1.488 (0.697,2.788)** |
| Self-employed | **3.271 (1.728,5.540)** | **1.330 (1.019,2.080)** |
| Employed | **2.229 (0.703,4.419)** | **0.906 (0.791,0.978)** |
| **Working Hours** | Natural process | **2.660 (1.023,4.933)** | **1.000 (1.000,1.000)** |
| Low working hours | **2.444 (0.475,4.191)** | **0.918 (0.347,1.626)** |
| Medium working hours | **2.570 (0.943,4.506)** | **0.966 (0.658,1.280)** |
| High working hours | **2.863 (0.527,5.886)** | **1.076 (0.216,1.697)** |
| **Work Environment** | Natural process | **2.676 (1.119,4.919)** | **1.000 (1.000,1.000)** |
| Outdoor | **3.427 (1.504,5.963)** | **1.280 (1.028,1.768)** |
| Workshop | **2.386 (1.178,4.698)** | **0.891 (0.705,1.304)** |
| Office | **2.267 (0.176,4.647)** | **0.847 (0.120,1.129)** |
| Home | 2.072 (0.193,4.503) | 0.774 (-0.074,1.218) |
| Other indoor | **2.764 (1.165,5.409)** | **1.032 (0.887,1.400)** |
| Inside transportation vehicles | **2.052 (0.196,5.098)** | **0.767 (0.024,1.443)** |
| **Job Promotion** | Natural process | **2.727 (1.162,4.976)** | **1.000 (1.000,1.000)** |
| Promotion to administrative position | **3.524 (1.540,6.983)** | **1.292 (0.739,2.529)** |
| Promotion to  technical title | **3.283 (1.411,6.167)** | **1.204 (0.836,2.025)** |
| Both | **3.018 (1.295,5.589)** | **1.106 (0.917,1.538)** |
| Neither | **2.741 (1.188,5.083)** | **1.005 (0.986,1.098)** |
| No higher position or rank available for promotion in this job | **2.515 (0.740,4.639)** | **0.922 (0.636,1.060)** |

Note: Bold figures indicate that the result was statistically significant.

**
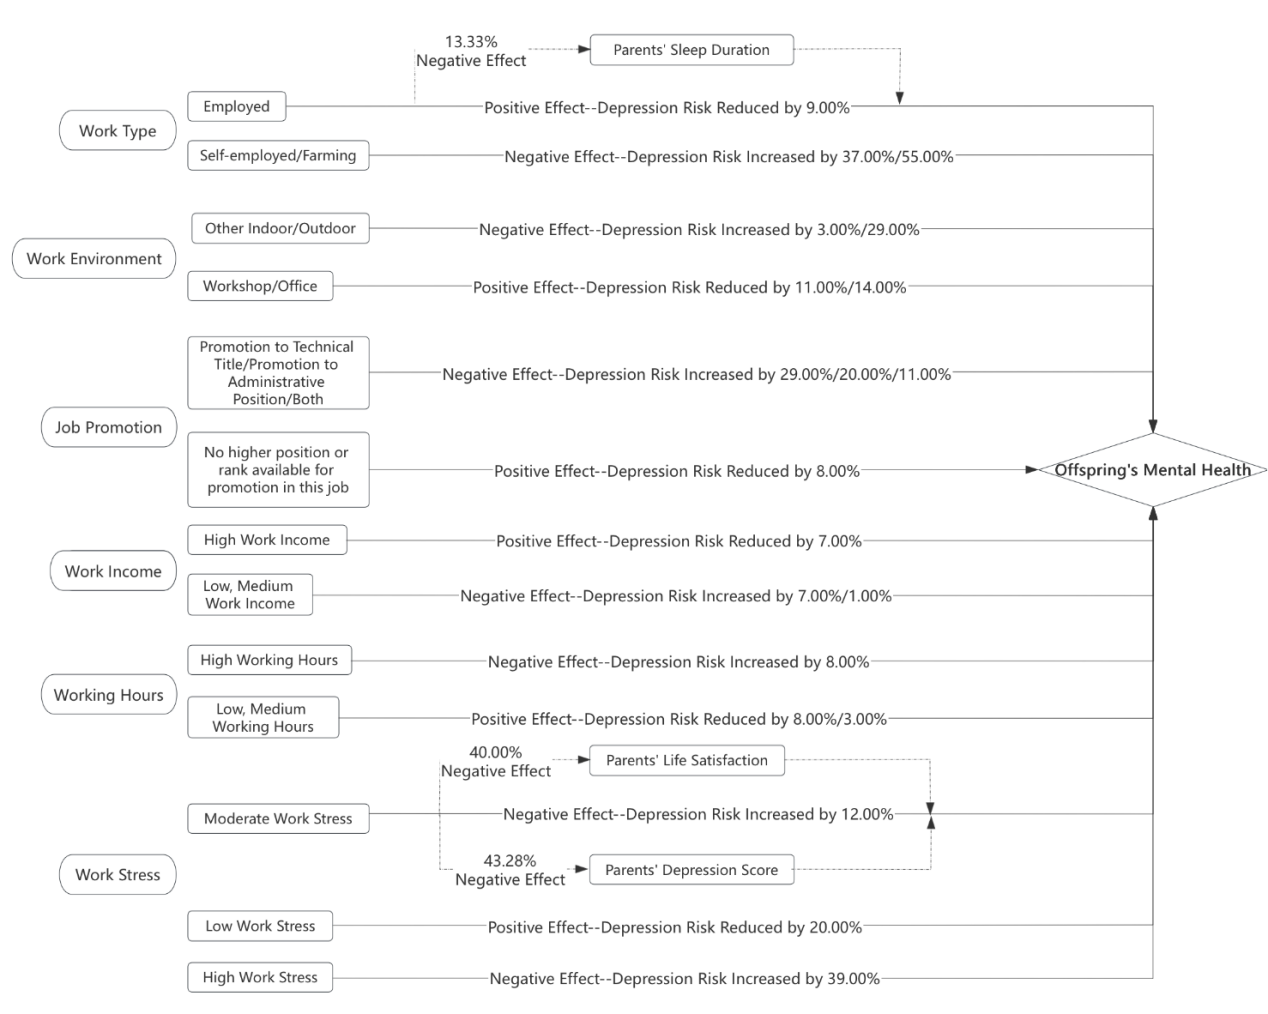
**

**Fig S1a.** Total sample

**
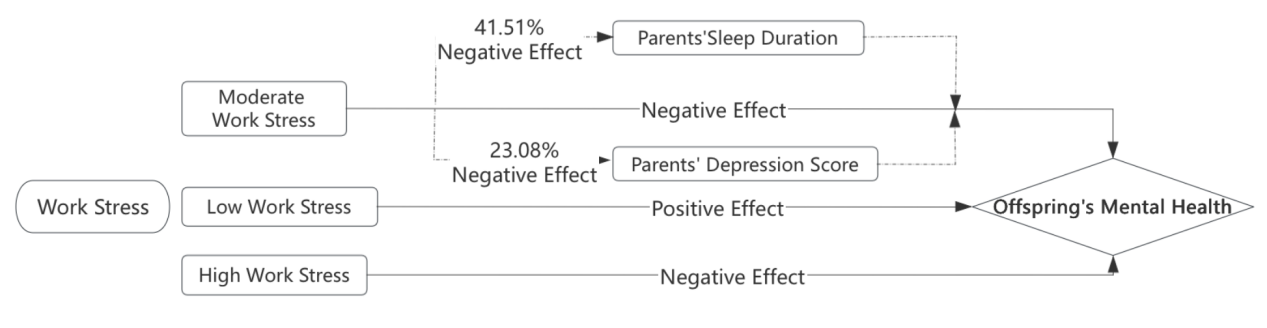
**

**Fig S1b.** Maternal sample

Note: Solid lines indicate direct effects, and dashed lines indicate indirect effects.

**Fig S1.** Mechanism pathways of parent’s occupation on offspring’s mental health
